# Supplementary material
Source: publisher figshare collection journal article supplement (https://frontiersin.figshare.com/ndownloader/files/16369955)
Supplement: Supplementary file [file 16369955]

## Supplemental Figures

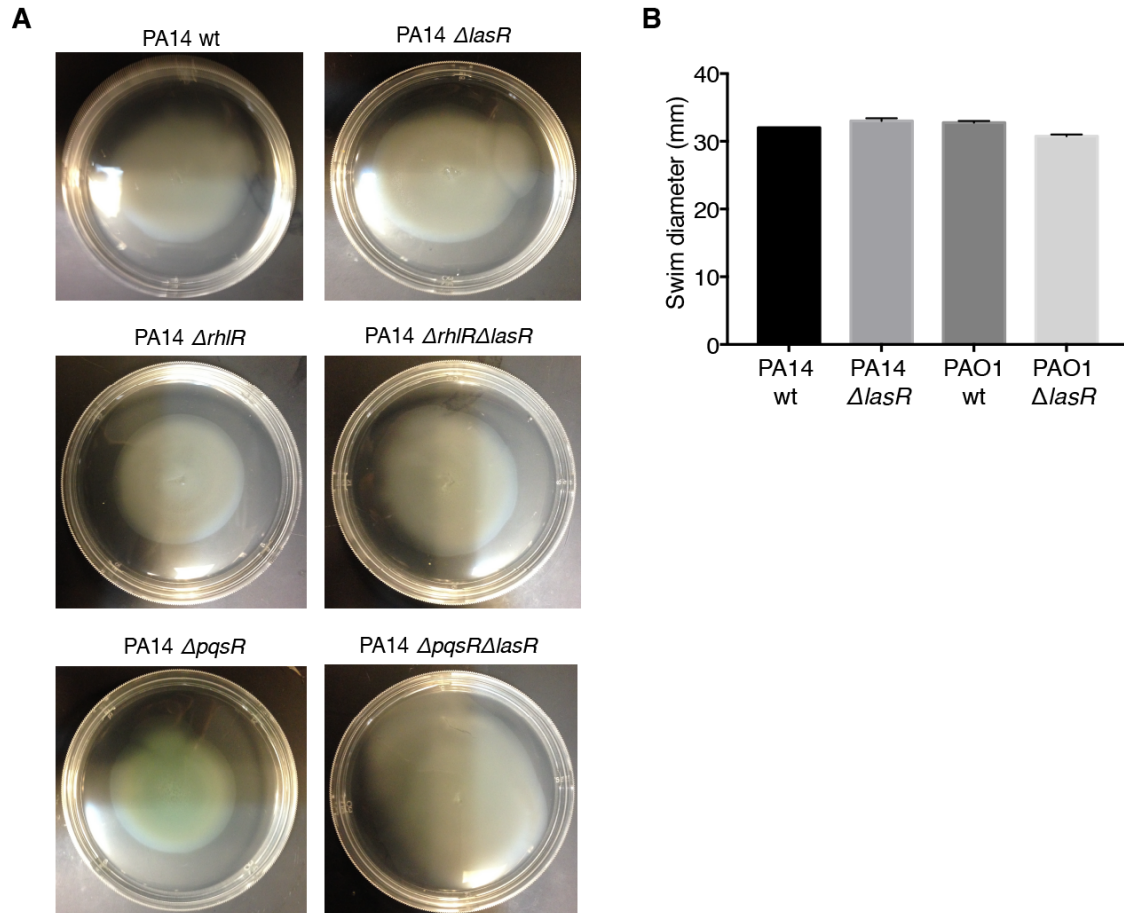

**Supplemental Figure 1: LasR-deficient *P. aeruginosa* strains are motile.** (A) Representative images of motility assays showing comparable motility capacities of wild-type and different mutant PA14 strains. (B) Quantification of swimming motility for wild-type and LasR-deficient PAO1 and PA14 *P. aeruginosa* strains (n=4). Data were analyzed by one-way ANOVA; error bars represent mean  $\pm$  SEM.

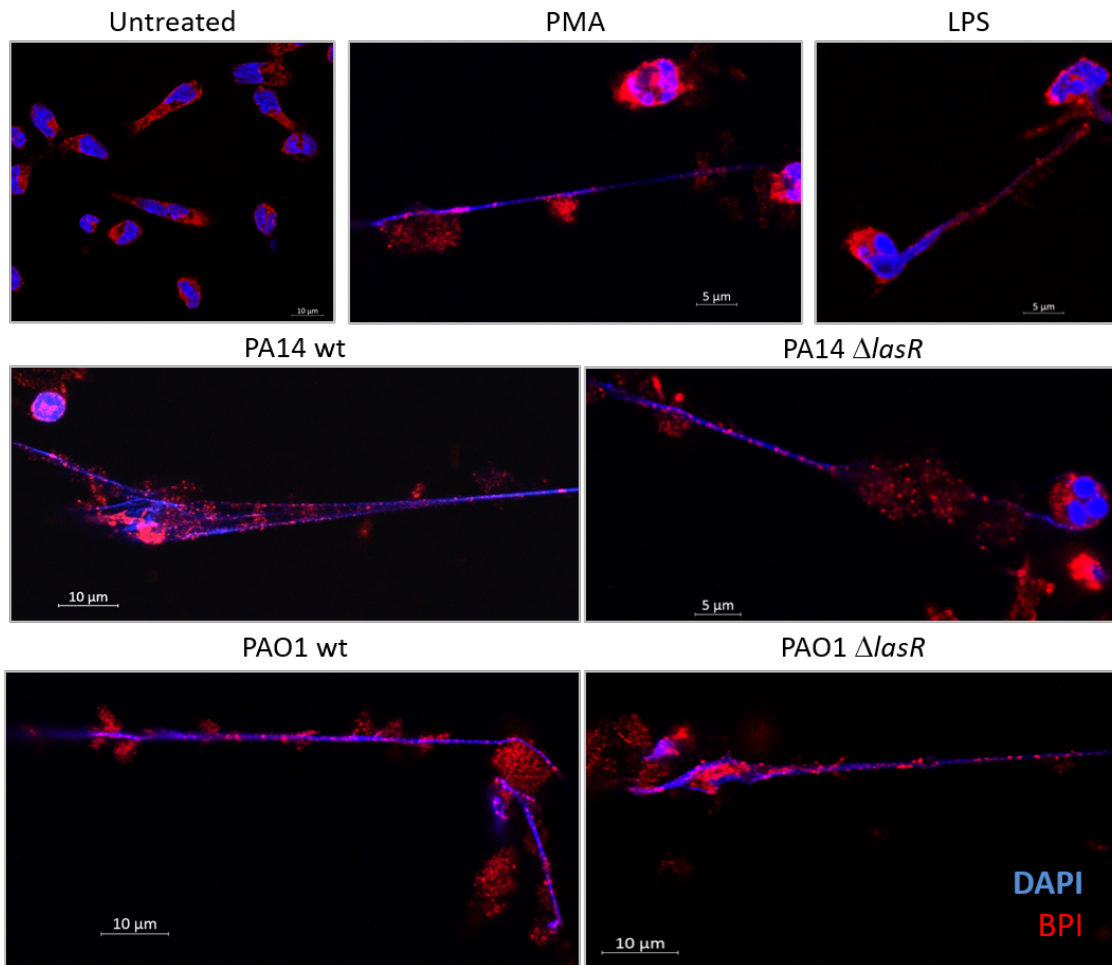

**Supplemental Figure 2: *P. aeruginosa* strains trigger NET release from mouse neutrophils.** BPI (red) is released onto the DNA (blue) strands from mouse neutrophils treated with PMA (100 nM), LPS (10  $\mu g/ml$ ), as well as PA14 and PAO1 wild-type (wt) and LasR-deficient ( $\Delta lasR$ ) and MOI = 10 for 3 hr.

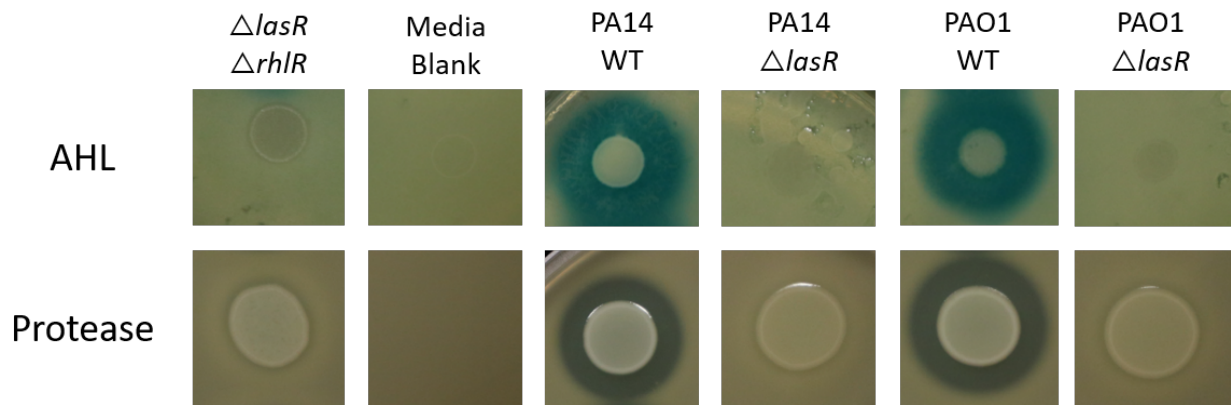

**Supplemental Figure 3: LasR-deficient *P. aeruginosa* strains lack quorum sensing ability and do not secrete proteases.** Only wild-type (wt) and not LasR-deficient ( $\Delta lasR$ ) PA14 and PAO1 strains produce acyl-homoserine lactones (AHL) thus activating the AHL-responsive PAO1 reporter strain (blue color, **top row**). Casein degradation, i.e. zone of clearance, was detected only in milk plates with wt PA14 and PAO1 bacterial cultures but not the LasR-deficient ( $\Delta lasR$ ) mutants, indicating lack of proteases in PA14 $\Delta lasR$  and PAO1 $\Delta lasR$  strains (**bottom row**).

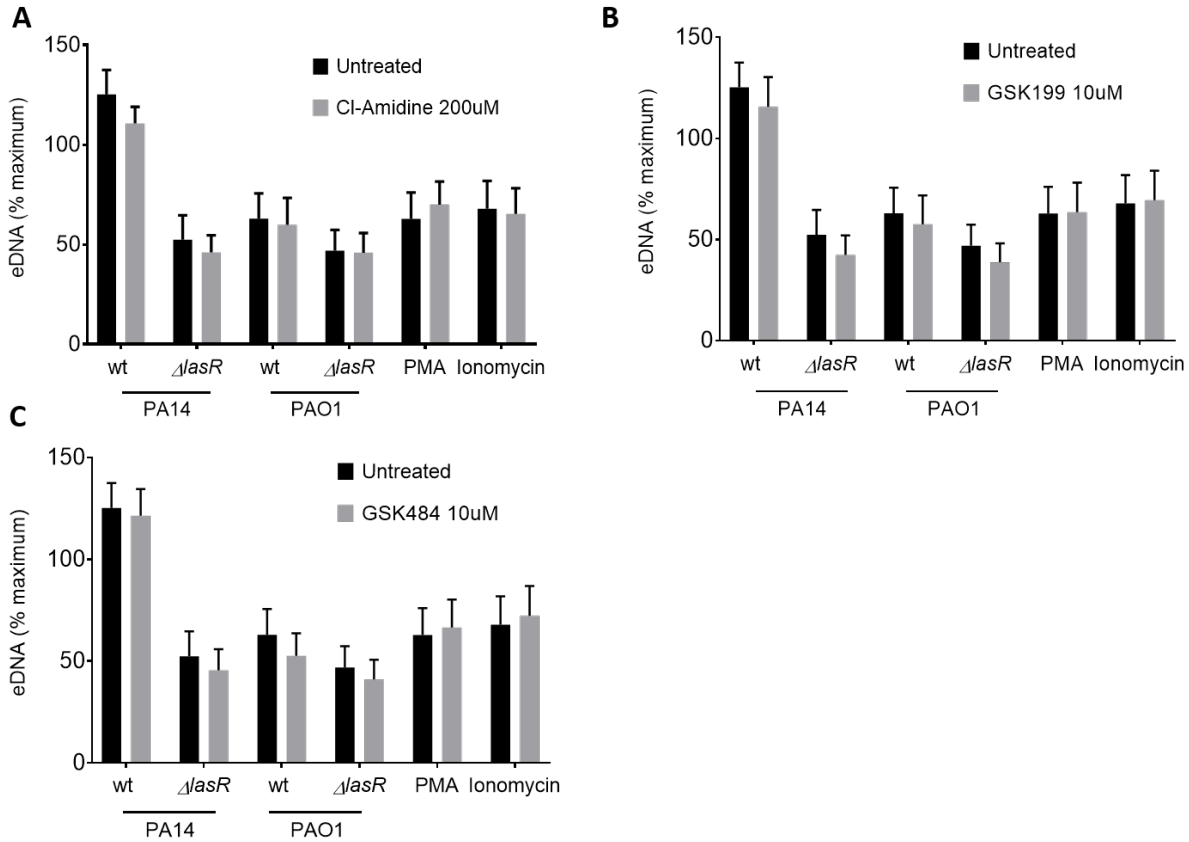

**Supplemental Figure 4: Induction of NETs by PMA and all *P. aeruginosa* strains was independent of PAD enzyme activity.** Inhibition of PAD enzyme activity by pre-treatment of neutrophils with (A) CI-amidine (200  $\mu$ M), (B) GSK199 (10  $\mu$ M), and (C) GSK484 (10  $\mu$ M) does not affect the amount of NET formation when stimulated with *P. aeruginosa* wild type (PA14 wt) (MOI 10), PA14  $\Delta lasR$  (MOI 10), PMA (100 nM), and ionomycin (5  $\mu$ M). Data were analyzed by one-way ANOVA; Error bars represent mean  $\pm$  SEM.

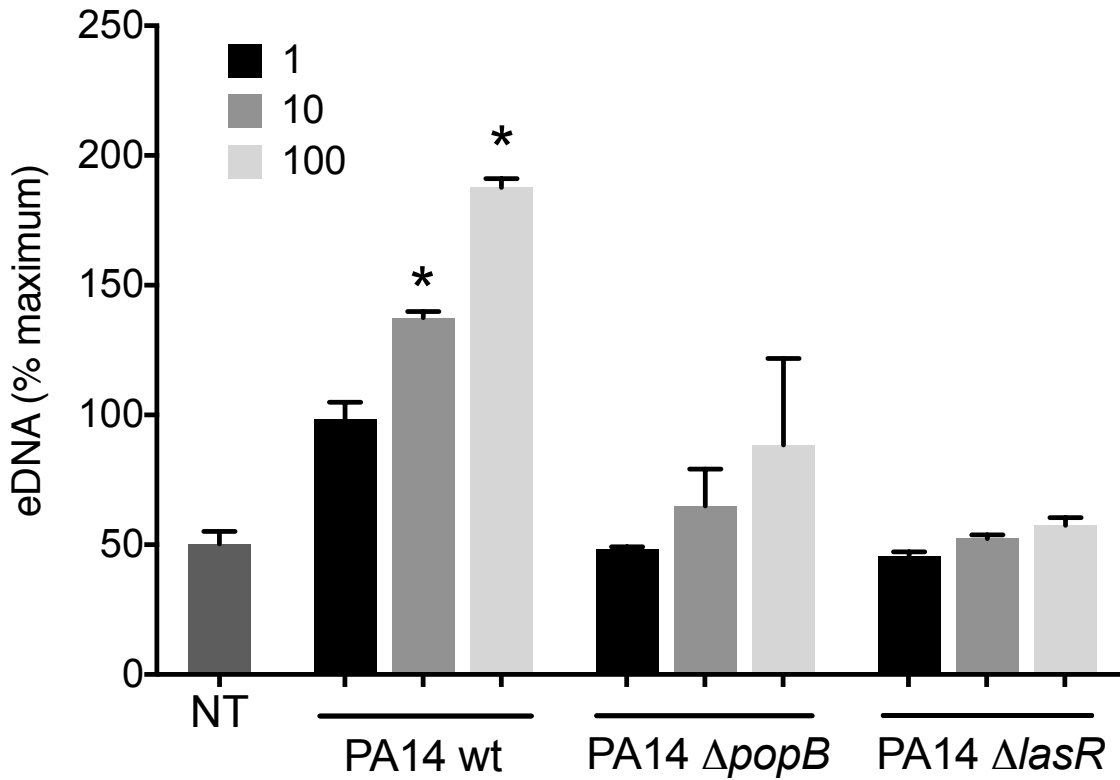

**Supplemental Figure 5: PA14  $\Delta popB$  and PA14  $\Delta lasR$  induce less NET release from human neutrophils.** Neutrophils from healthy donor were treated with different MOIs (1,10,100) of *P. aeruginosa* PA14 wild type (PA14 wt), PopB-deficient ( $\Delta popB$ ), LasR-deficient ( $\Delta lasR$ ) followed by incubation to form NETs. The amount of NET formation induced by both PA14  $\Delta popB$  as well as PA14  $\Delta lasR$  are less than that of their wild-type counterpart. Data were analyzed by two-way ANOVA; \*\*\* $p < 0.0001$ , \*\* $p < 0.001$ , \* $p < 0.05$ ; Error bars represent mean  $\pm$  SEM.
